# Supplementary figures and images for: Active contraction of microtubule networks
Source: eLife journal article supplement (doi:10.7554/elife.10837), 2015-12-22

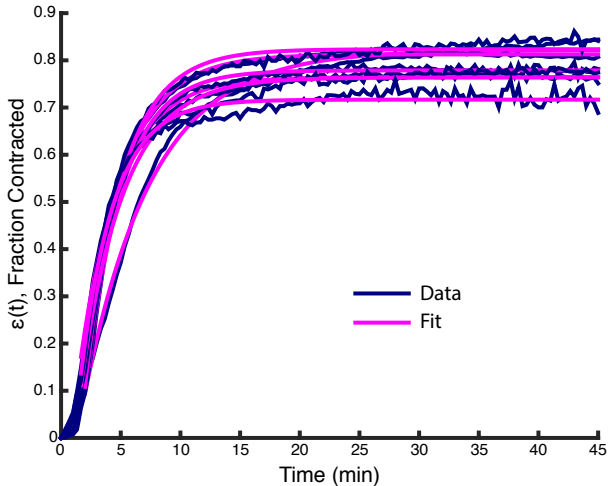

Supplement: supp [file elife_poa_e10837_Figure_2_figure_supplement_1.pdf › elife_poa_e10837_Figure_2_figure_supplement_1.pdf]

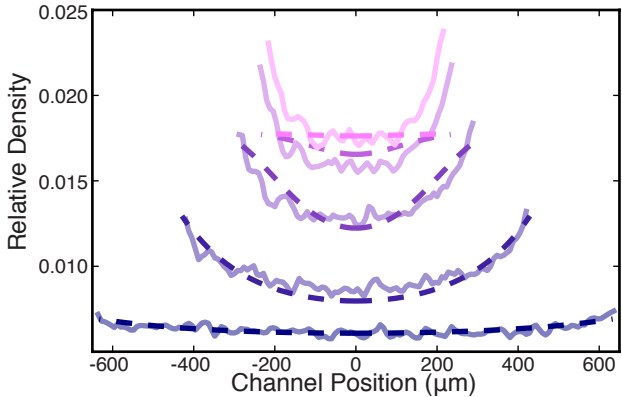

Supplement: supp [file elife_poa_e10837_Figure_5_figure_supplement_1.pdf › elife_poa_e10837_Figure_5_figure_supplement_1.pdf]

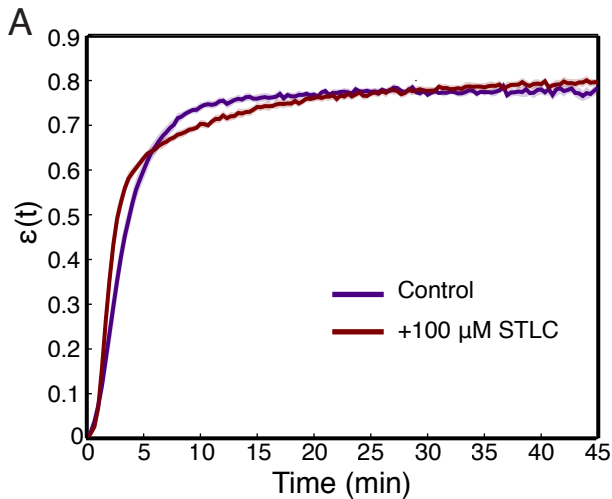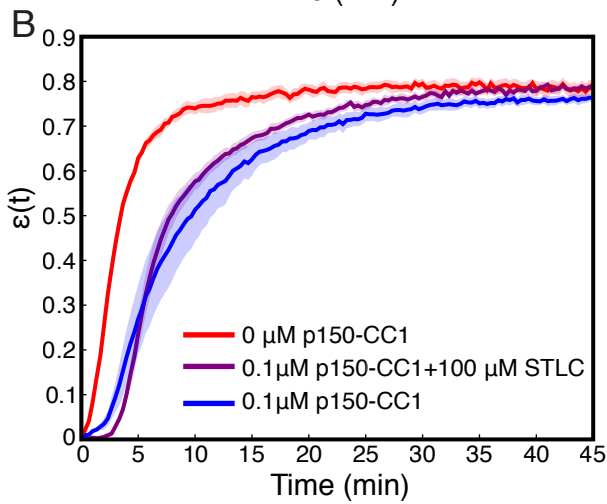

Supplement: supp [file elife_poa_e10837_Figure_6_figure_supplement_1.pdf › elife_poa_e10837_Figure_6_figure_supplement_1.pdf]

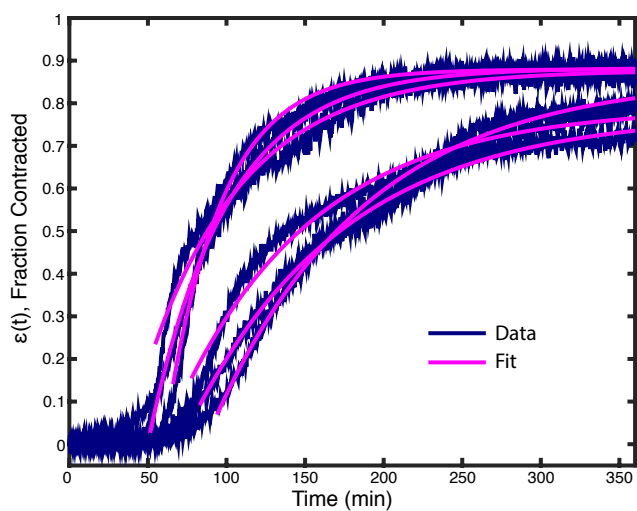

Supplement: supp [file elife_poa_e10837_Figure_6_figure_supplement_2.pdf › elife_poa_e10837_Figure_6_figure_supplement_2.pdf]
